# Supplementary material for: The Effects of Rainfall on the Population Dynamics of an Endangered Aquatic Plant, Schoenoplectus gemmifer (Cyperaceae)
Source: PLoS One. 2016 Jun 21;11(6):e0157773. doi: 10.1371/journal.pone.0157773 (PMC4915625; doi:10.1371/journal.pone.0157773)
Supplement: S4 Table — The numeral "zero" indicates that the plant was washed out. Dates I–IV are defined in the text. (XLSX) [file pone.0157773.s005.xlsx]

## Sheet: Sheet1
S4 Table
Sample No.	Date I	Date II	Date III	Date IV
1	68	0	0	0
2	296	111	0	0
3	291	0	0	0
4	58	323	18	32
5	32	0	0	0
6	211	0	0	0
7	120	52	0	0
8	60	101	0	0
9	671	97	0	0
10	317	89	0	0
11	538	106	38	0
12	686	16	83	0
13	879	56	0	0
14	307	59	45	0
15	427	0	0	0
16	533	0	0	0
17	436	0	0	0
18	300	127	149	0
19	114	0	0	0
20	355	0	0	0
21	194	0	0	0
22	385	107	68	22
23	134	141	0	0
24	110	79	0	0
25	319	219	0	0
26	201	61	0	0
27	256	30	65	0
28	305	22	71	0
29	328	74	69	41
30	216	0	0	0
31	242	0	0	0
32	268	72	0	0
33	190	15	20	0
34	552	0	0	0
35	165	0	0	0
36	19	0	0	0
37	123	296	56	13
38	3	256	15	0
